# Supplementary material
Source: Springer Nature journal article supplement (https://www.springermedizin.de/resource/supplementary/12936_2014_3166_MOESM5_ESM.pdf/9545264)

**A****Log<sub>10</sub> [% parasitemia]**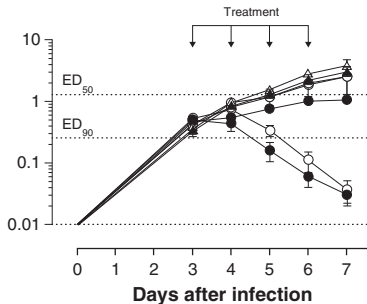**B****Log<sub>10</sub> [% parasitemia]**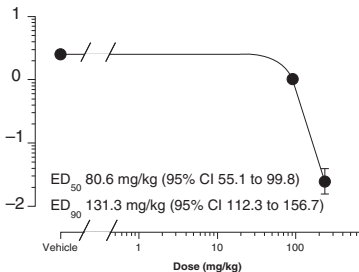

Supplement: MOESM5 [file 9545264]
